# Supplementary material
Source: Springer Nature journal article supplement (https://www.springermedizin.de/resource/supplementary/12884_2007_121_MOESM3_ESM.pdf/9459668)

**(a)**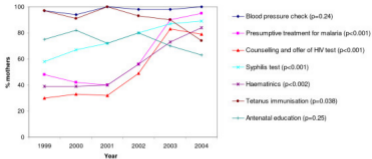**(b)**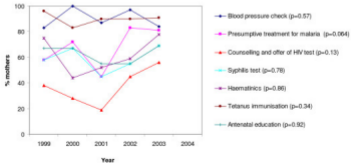

Supplement: MOESM3 [file 9459668]
